# Supplementary material for: Extreme geographic misalignment of healthcare resources and HIV treatment deserts in Malawi
Source: Springer Nature journal article supplement (doi:10.1038/s41591-025-03561-6), 2025-03-14
Supplement: MOESM1 [file 41591_2025_3561_MOESM1_ESM.pdf]

# Extreme geographic misalignment of healthcare resources and HIV treatment deserts in Malawi

---

In the format provided by the  
authors and unedited

| <b>Table of contents</b>                                                                                                                                                                  | <b>Page</b> |
|-------------------------------------------------------------------------------------------------------------------------------------------------------------------------------------------|-------------|
| S1 <b>Supplementary Table 1.</b> The level of service at each of the 758 HCFs that provided ART.                                                                                          | 2           |
| S2 <b>Supplementary Table 2.</b> The effect of varying travel speeds on the number of HCFs in a community's catchment area.                                                               | 2           |
| S3 <b>Supplementary Table 3.</b> Gini coefficient ( <i>G</i> ) for each of the six catchment sizes explored in the spatial sensitivity analysis.                                          | 3           |
| S4 <b>Supplementary Table 4.</b> Global Moran's Index ( <i>I</i> ) for each of the six catchment sizes explored in the spatial sensitivity analysis.                                      | 3           |
| S5 <b>Supplementary Table 5.</b> The values of the SAA Index inside, and outside, deserts.                                                                                                | 3           |
| S6 <b>Supplementary Table 6.</b> Results from the LISA cluster maps showing the percentage of people with HIV in each cluster or spatial outlier.                                         | 4           |
| S7 <b>Supplementary Table 7.</b> Results from the LISA cluster maps showing the percentage of communities in each cluster or spatial outlier.                                             | 4           |
| S8 <b>Supplementary Table 8.</b> Type of HCF found inside, and outside, of HIV treatment deserts.                                                                                         | 5           |
| S9 <b>Supplementary Table 9.</b> Validation statistics for the Empirical Bayesian Kriging (EBK) model that was used to construct the HIV prevalence map shown in Extended Data Figure 3a. | 6           |
| S10 <b>Supplementary Table 10.</b> Baseline travel speeds specified by terrain and mode of transportation.                                                                                | 6           |

| Catchment   | Level of service |       |       |
|-------------|------------------|-------|-------|
|             | Median           | Mean  | Max   |
| W 1 hour    | 1.248            | 2.021 | 30.90 |
| W 2 hours   | 0.651            | 1.052 | 19.02 |
| W 3 hours   | 0.569            | 0.917 | 14.12 |
| MBW 1 hour  | 0.583            | 0.875 | 13.37 |
| MBW 2 hours | 0.575            | 0.888 | 13.45 |
| MBW 3 hours | 0.571            | 0.894 | 13.52 |

**Supplementary Table 1. The level of service at each of the 758 HCFs that provided ART.** The level of service at a HCF is defined as the localized supply to demand ratio for ART in that HCF's catchment area. Results are shown for the six catchment sizes explored in the spatial sensitivity analysis. Catchment sizes are based on varying the maximum one-way travel-time (one, two, or three hours), and mode of transportation: walking only (W), or using a combination of motorized transportation, bicycling and walking (MBW).

| Transportation<br>& travel speed | Number of HCFs |      |     |         |         |         |         |
|----------------------------------|----------------|------|-----|---------|---------|---------|---------|
|                                  | Median         | Mean | Max | No HCFs |         | One HCF |         |
| W lowest                         | 1              | 3    | 40  | 21.6%   | (16.4%) | 37.0%   | (30.3%) |
| W baseline                       | 2              | 5    | 44  | 11.4%   | (8.8%)  | 29.2%   | (22.7%) |
| W highest                        | 3              | 6    | 49  | 6.0%    | (4.6%)  | 20.1%   | (14.8%) |
| MBW lowest                       | 60             | 75   | 191 | 0.3%    | (0.2%)  | 0.1%    | (0.1%)  |
| MBW baseline                     | 109            | 108  | 232 | 0.2%    | (0.1%)  | 0.1%    | (0.1%)  |
| MBW highest                      | 129            | 127  | 251 | 0.1%    | (0.0%)  | 0.1%    | (0.1%)  |

**Supplementary Table 2. The effect of varying travel speeds on the number of HCFs in a community's catchment area.** Results from an analysis examining the effect of varying travel speeds on the number of HCFs that can be accessed by a community within a maximum one-way travel-time of 2 hours, using a specific mode of transportation: walking (W) or using a combination of motorized transportation, bicycling, and walking (MBW). Results are shown for three travel speeds: baseline (given in Supplementary Table 10), lowest (20% below baseline), and highest (20% above baseline). Results show the percentage of communities (and, in parenthesis, the percentage of people with HIV) that cannot access any HCFs in the maximum one-way travel-time (this is labeled as: No HCFs), and the percentage of communities (and, in parenthesis, the percentage of people with HIV) that can only access one HCF in the maximum one-way travel-time (this is labeled as: One HCF).

| Catchment   | <i>G</i> |
|-------------|----------|
| W 1 hour    | 0.79     |
| W 2 hours   | 0.60     |
| W 3 hours   | 0.53     |
| MBW 1 hour  | 0.30     |
| MBW 2 hours | 0.23     |
| MBW 3 hours | 0.21     |

**Supplementary Table 3. Gini coefficient (*G*) for each of the six catchment sizes explored in the spatial sensitivity analysis.** Catchment sizes are based on varying the maximum one-way travel-time (one, two, or three hours), and mode of transportation: walking only (W), or using a combination of motorized transportation, bicycling and walking (MBW).

| Catchment   | <i>I</i> |
|-------------|----------|
| W 1 hour    | 0.34     |
| W 2 hours   | 0.75     |
| W 3 hours   | 0.79     |
| MBW 1 hour  | 0.79     |
| MBW 2 hours | 0.90     |
| MBW 3 hours | 0.91     |

**Supplementary Table 4. Global Moran's Index (*I*) for each of the six catchment sizes explored in the spatial sensitivity analysis.** Catchment sizes are based on varying the maximum one-way travel-time (one, two, or three hours), and mode of transportation: walking only (W), or using a combination of motorized transportation, bicycling and walking (MBW).

| Desert:     | Inside |               | Outside |               | Significance |          |
|-------------|--------|---------------|---------|---------------|--------------|----------|
| Catchment   | Mean   | IQR           | Mean    | IQR           | t            | <i>P</i> |
| W 1 hour    | 0.001  | (0.000,0.000) | 0.198   | (0.000,0.213) | 29.7         | <.001    |
| W 2 hours   | 0.012  | (0.000,0.020) | 0.112   | (0.039,0.132) | 47.7         | <.001    |
| W 3 hours   | 0.015  | (0.007,0.021) | 0.098   | (0.041,0.114) | 57.5         | <.001    |
| MBW 1 hour  | 0.036  | (0.029,0.045) | 0.085   | (0.060,0.091) | 73.6         | <.001    |
| MBW 2 hours | 0.045  | (0.039,0.052) | 0.083   | (0.064,0.090) | 80.0         | <.001    |
| MBW 3 hours | 0.046  | (0.042,0.053) | 0.083   | (0.065,0.092) | 81.0         | <.001    |

**Supplementary Table 5. The values of the SAA Index inside, and outside, deserts.** The Table shows summary statistics: mean, and interquartile range (IQR). Two-sample t-tests were used to compare the mean SAA Index inside, and outside, deserts; significance was assessed at  $\alpha=0.05$ . Results are shown for the six catchment sizes explored in the spatial sensitivity analysis. Catchment sizes are based on varying the maximum one-way travel-time (one, two, or three hours), and mode of transportation: walking only (W), or using a combination of motorized transportation, bicycling and walking (MBW).

| <b>Classification</b>    | <b>W<br/>1 hour</b> | <b>W<br/>2 hours</b> | <b>W<br/>3 hours</b> | <b>MBW<br/>1 hour</b> | <b>MBW<br/>2 hours</b> | <b>MBW<br/>3 hours</b> |
|--------------------------|---------------------|----------------------|----------------------|-----------------------|------------------------|------------------------|
| Not significant          | 78%                 | 66%                  | 65%                  | 69%                   | 68%                    | 64%                    |
| Treatment desert         | 15%                 | 23%                  | 23%                  | 23%                   | 22%                    | 22%                    |
| Cluster of abundance     | 4%                  | 10%                  | 11%                  | 8%                    | 10%                    | 13%                    |
| Low-high spatial outlier | 2%                  | 0%                   | 0%                   | 0%                    | 0%                     | 0%                     |
| High-low spatial outlier | 0%                  | 0%                   | 0%                   | 0%                    | 0%                     | 0%                     |

**Supplementary Table 6. Results from the LISA cluster maps showing the percentage of people with HIV in each cluster or spatial outlier.** A treatment desert is a cluster of communities with very low values of the SAA Index. A cluster of abundance is an area where all communities have very high values of the SAA Index. A low-high spatial outlier is an area that contains communities with low values of the SAA Index and neighboring communities with high values. A high-low spatial outlier is an area that contains communities with high values of the SAA Index and neighboring communities with low values. Results are shown for the six catchment sizes explored in the spatial sensitivity analysis. Catchment sizes are based on varying the maximum one-way travel-time (one, two, or three hours), and mode of transportation: walking only (W), or using a combination of motorized transportation, bicycling and walking (MBW). Columns may not sum to 100% due to rounding.

| <b>Classification</b>    | <b>W<br/>1 hour</b> | <b>W<br/>2 hours</b> | <b>W<br/>3 hours</b> | <b>MBW<br/>1 hour</b> | <b>MBW<br/>2 hours</b> | <b>MBW<br/>3 hours</b> |
|--------------------------|---------------------|----------------------|----------------------|-----------------------|------------------------|------------------------|
| Not significant          | 76%                 | 64%                  | 62%                  | 63%                   | 65%                    | 63%                    |
| Treatment desert         | 16%                 | 25%                  | 27%                  | 26%                   | 25%                    | 26%                    |
| Cluster of abundance     | 5%                  | 10%                  | 11%                  | 10%                   | 10%                    | 11%                    |
| Low-high spatial outlier | 2%                  | 1%                   | 0%                   | 1%                    | 0%                     | 0%                     |
| High-low spatial outlier | 0%                  | 0%                   | 0%                   | 0%                    | 0%                     | 0%                     |

**Supplementary Table 7. Results from the LISA cluster maps showing the percentage of communities in each cluster or spatial outlier.** A treatment desert is a cluster of communities with very low values of the SAA Index. A cluster of abundance is an area where all communities have very high values of the SAA Index. A low-high spatial outlier is an area that contains communities with low values of the SAA Index and neighboring communities with high values. A high-low spatial outlier is an area that contains communities with high values of the SAA Index and neighboring communities with low values. Results are shown for the six catchment sizes explored in the spatial sensitivity analysis. Catchment sizes are based on varying the maximum one-way travel-time (one, two, or three hours), and mode of transportation: walking only (W), or using a combination of motorized transportation, bicycling and walking (MBW). Columns may not sum to 100% due to rounding.

|          |           | Catchment: |  | W 1 hour |         | W 2 hours |         | W 3 hours |         | MBW 1 hour |         | MBW 2 hours |         | MBW 3 hours |         |
|----------|-----------|------------|--|----------|---------|-----------|---------|-----------|---------|------------|---------|-------------|---------|-------------|---------|
|          |           | Desert:    |  | Inside   | Outside | Inside    | Outside | Inside    | Outside | Inside     | Outside | Inside      | Outside | Inside      | Outside |
| HCF type | Primary   |            |  | 88%      | 75%     | 98%       | 73%     | 96%       | 73%     | 98%        | 71%     | 94%         | 71%     | 95%         | 71%     |
|          | Secondary |            |  | 0%       | 12%     | 0%        | 13%     | 0%        | 13%     | 2%         | 14%     | 3%          | 14%     | 2%          | 14%     |
|          | Tertiary  |            |  | 13%      | 13%     | 2%        | 14%     | 4%        | 14%     | 0%         | 16%     | 2%          | 15%     | 2%          | 15%     |

**Supplementary Table 8. Type of HCF found inside, and outside, of HIV treatment deserts.** HCFs are classified by the level of healthcare (primary, secondary, or tertiary) that they provide. Results are shown for the six catchment sizes explored in the spatial sensitivity analysis. Catchment sizes are based on varying the maximum one-way travel-time (one, two, or three hours), and mode of transportation: walking only (W), or using a combination of motorized transportation, bicycling and walking (MBW). Columns may not sum to 100% due to rounding.

| <b>EBK cross-validation metrics</b> | <b>Value</b> |
|-------------------------------------|--------------|
| Mean Error                          | 0.00         |
| Root Mean Square                    | 0.06         |
| Mean Standardized                   | 0.00         |
| RMS–Standardized                    | 0.99         |
| Ave Standard Error                  | 0.06         |
| Average CRPS                        | 0.03         |
| Inside 90% Interval                 | 90.8%        |
| Inside 95% Interval                 | 95.0%        |

**Supplementary Table 9. Validation statistics for the Empirical Bayesian Kriging (EBK) model that was used to construct the HIV prevalence map shown in Extended Data Figure 3a.** EBK was conducted using a K-Bessel semivariogram model. The EBK model performs well across all cross-validation metrics.

| <b>Terrain</b>                | <b>Drive, bike and walk</b> |           | <b>Walk only</b> |         |
|-------------------------------|-----------------------------|-----------|------------------|---------|
|                               | Speed<br>(km/h)             | Mode      | Speed<br>(km/h)  | Mode    |
| Shrubland                     | 4                           | WALKING   | 4                | WALKING |
| Herbaceous vegetation         | 4                           | WALKING   | 4                | WALKING |
| Cropland                      | 4                           | WALKING   | 4                | WALKING |
| Built-up areas                | 15                          | BICYCLING | 4                | WALKING |
| Bare sparse vegetation        | 4                           | WALKING   | 4                | WALKING |
| Herbaceous wetland            | 4                           | WALKING   | 4                | WALKING |
| Evergreen broadleaf forests   | 4                           | WALKING   | 4                | WALKING |
| Deciduous broadleaf forests   | 4                           | WALKING   | 4                | WALKING |
| Trunk road                    | 60                          | MOTORIZED | 4                | WALKING |
| Primary road                  | 50                          | MOTORIZED | 4                | WALKING |
| Secondary road                | 40                          | MOTORIZED | 4                | WALKING |
| Tertiary road                 | 30                          | MOTORIZED | 4                | WALKING |
| Residential/unclassified road | 30                          | MOTORIZED | 4                | WALKING |
| Service road                  | 25                          | MOTORIZED | 4                | WALKING |
| Path/footway/track            | 4                           | WALKING   | 4                | WALKING |
| Bridleway/cycleway            | 15                          | BICYCLING | 4                | WALKING |
| Pedestrian street             | 4                           | WALKING   | 4                | WALKING |

**Supplementary Table 10. Baseline travel speeds specified by terrain and mode of transportation.** These travel speeds were used for the six catchment sizes explored in the spatial sensitivity analysis.
